# Supplementary material
Source: publisher figshare collection journal article supplement (https://frontiersin.figshare.com/ndownloader/files/27974958)
Supplement: Supplementary file [file 27974958]

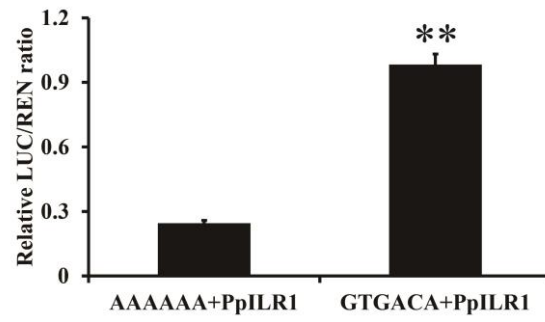

Fig. S9. The GTGACA (AAAAAA) element in the *PpACSI-PI* promoter was repeated six times. The oligonucleotides with partially complementary sequences were annealed, and then was used to cloning into the pGreenII0800-LUC vector which already containing the *PpACSI-PI* promoter.
